# Supplementary material for: Exploiting Locusta migratoria as a source of bioactive peptides with anti-fibrosis properties using an in silico approach
Source: Royal Society of Chemistry journal article supplement (doi:10.1039/d3fo04246d), 2023-12-01
Supplement: d3fo04246d1.xlsx [file d3fo04246d1.xlsx]

## Sheet: Table S1
Accession number	ALD51386.1			AKN21235.1			AMO66175.1			API80737.1			AQY60265.1			DAA64589.1			P14570			P19872			P80059
Protein name	odorant receptor 126			cchamide-2 precursor			defensin 4			autophagy-related protein 2			CYP3117C1			serine protease-like protein 1			ATP synthase protein 8			Adipokinetic prohormone type 3			Pars intercerebralis major peptide D
	Total number of fragments obtained after simulated GI digestion	peptides (>1aa) with known biological activity	peptides (>1aa) with unknown biological activity	Total number of fragments obtained after simulated GI digestion	peptides (>1aa) with known biological activity	peptides (>1aa) with unknown biological activity	Total number of fragments obtained after simulated GI digestion	peptides (>1aa) with known biological activity	peptides (>1aa) with unknown biological activity	Total number of fragments obtained after simulated GI digestion	peptides (>1aa) with known biological activity	peptides (>1aa) with unknown biological activity	Total number of fragments obtained after simulated GI digestion	peptides (>1aa) with known biological activity	peptides (>1aa) with unknown biological activity	Total number of fragments obtained after simulated GI digestion	peptides (>1aa) with known biological activity	peptides (>1aa) with unknown biological activity	Total number of fragments obtained after simulated GI digestion	peptides (>1aa) with known biological activity	peptides (>1aa) with unknown biological activity	Total number of fragments obtained after simulated GI digestion	peptides (>1aa) with known biological activity	peptides (>1aa) with unknown biological activity	Total number of fragments obtained after simulated GI digestion	peptides (>1aa) with known biological activity	peptides (>1aa) with unknown biological activity
	M	IR	ESM	M	IR	SAK	M	VGL	STVF	M	VF	SN	M	VF	SVW	M	VY	IK	M	SY	PQM	M	GK	QVR	SCTEK	_	SCTEK
	EF	VF	GPGL	SAK	PR	TAVAL	K		TTAGIAF	R	PL	PCIAEIVSTVR	SVW	VY	GAAL	IK	VK	EAVL	PQM	SL	SPM	QVR	VL	AVVAL	TCPGTETCCTTPQGEEGCCPY		TCPGTETCCTTPQGEEGCCPY
	ESM	PL	TGL	QH	VL	GDAAPSAVH	N		CSAAPAQSVQDDR	GM	GM	IEIL	L	PR	ATVCACAL	EAVL	GM	AACVSAAVL	SPM	IM	SSN	AVL	AL	VAVATSR	K		EGVCCL
	M	VK	QM	TAVAL	AL	AAR	STVF		QAH	SL	GL	PGIK	VF	AY	AVASW	VL	GL	PVR	M	IN	IK	VL	AQL	TPW	EGVCCL		DGIH
	GPGL	AF	QGGGVSR	L	QH	PVR	F		TCDSL	L	GR	VSEAM	GAAL	PL	ATR	AL	EY	IAH	W	PN		AVVAL	AVL	GAPAAGDCVSASPQAL	DGIH		CCPSGTVCDEDH
	PL	IF	ATIVL	GDAAPSAVH	VH	AADR	L		SAL	L	QK	CR	ATVCACAL	GF	QTAAPGPPTW	AACVSAAVL	VL	SGPL	F	QL		VAVATSR		SIL	CCPSGTVCDEDH		CIQ
	M	GL	VVAGSTL	AAR	GVR	GGVPVR	VGL		GVPCAAVR	L	SY	SVF	AVASW	GL	GN	PVR	AL	TGL	SL	TM		AQL		AAQAEVQK	R
	R	GH	DTPDQF	R		AAPSAGH	L		CVK	SN	SF	TAIR	L	SY	VQH	R	IN	QGR	F	SM		N		IDCSR	R
	L	GR	EDITL	IR		QTW	TTAGIAF		GAY	EH	SDF	VIDIIN	W	SF	QPVL	IAH	PY	IVGGK	IM			F		TSEAN	CIQ
	TGL	TE	CGF	R		QAR	CSAAPAQSVQDDR		CQH	SF	TY	PETETVL	ATR	AR	AADL	SGPL	QL	EAEEGQF	F			TPW
	W	EL	IDIVSL	R		PGAGGGGAGR	QAH		GVCH	PCIAEIVSTVR	VL	SAVH	L	EY	GDVF	R	TL	SVSIQW	SM			W
	QM	TF	DL	PVR		GGGGSGGAAGR	L		CR	IEIL	IL	TEDW	QTAAPGPPTW	PW	VGPK	K	TR	SGVSSH	TM			GK
	GR	EF	GVL	R		PGGAGGGGGAGGGGTAIPPVAVPAAVAAACL	TCDSL			L	SL	STQDSSCF	PL	VL	VVVVTK	TGL	SM	CGGAL	M			R
	QGGGVSR	IL	VVQGAPL	AADR		PATVS	SAL			TH	EH	AGY	L	AL	PEDVK	K		DDVVVTAGQCAH	L			AL
	GL	AL	VQL	GGVPVR			GVPCAAVR			SY	PF	VQK	GN	SL	VTTK	QGR		VVTY	F			GAPAAGDCVSASPQAL
	R	SL	CDAR	AAPSAGH			CVK			F	QL	TIGDSSSECSIF	VQH	EH	QER	IVGGK		TTVVAGR	N			L
	L	QL	AGF	AAR			GAY			N	SH	EM	F	IN	DPY	EAEEGQF		DESVY	QL			SIL
	ATIVL	TK	ADIN	R			CQH			SL	TH	VVN	L	PF	GTL	PY		GQSTL	N			N
	SVL	TL	AIR	R			GVCH			SN	TL	SSR	K	QF	VTGN	SVSIQW		EISH	F			AAQAEVQK
	L	VN	EAVADR	R			CR			N	TR	QCVQN	QPVL	QY	SGEVW	QL		PEY	F			L
	VVAGSTL	SVL	QATVVL	QTW			V			R	SVY	GSL	L	TH	QR	SGVSSH		VVN	SY			IDCSR
	H		VGW	VH						K	SM	CM	EH	TK	EPTF	F		AIN	K			F
	L		SAPL	GVR						PGIK		ETL	AADL	TL	TAL	CGGAL		DIAVF	PN			TSEAN
	VF		SR	AL						L		CIEI	Y		DTF	VK		TVGF	K			S
	DTPDQF		AAGAGGSR	VL						L			K		EVCL	DDVVVTAGQCAH		DL	IM
	EDITL		APR	R						F			QY		SER	VVTY		SDK	SSN
	CGF		PVPAW	R						H			GDVF		AAM	GL		VIGL	N
	N		PVDIH	PR						QK			R		GGQESDVL	TTVVAGR		PSQDQK	K
	IDIVSL		ATPTY	QAR						L			F		CL	VY		AQAATL	IK
	DL		QAF	R						Y			Y		SSL	M		SGW	K
	L		GCTAAGAF	PGAGGGGAGR						F			VGPK		ITM	DESVY		GSTSN	K
	K		SICVDAF	GGGGSGGAAGR						M			L		CAL	GQSTL		PETSDTL	N
	GVL		ISAEIEVL	PGGAGGGGGAGGGGTAIPPVAVPAAVAAACL						F			VVVVTK		GGM	W		AEVTVIPTVN	IN
	F		CEN	PATVS						VSEAM			PEDVK		DVVEPDQY	EISH		CY	W
	VVQGAPL		ISAIGVPH							F			R		QQQQL	PEY		TDDSTF	M
	R		PAQGSGGCICR							SN			VL		ASEF	K		ICSGPVTGK	W
	EL		CQPN							CR			VTTK		IGF	VVN		ISSCVGDIGSPL
	VQL		AADL							F			W		QATM	N		VQY
	L		ACTCK							L			QER		AIN	H		GN
	CDAR		GCVK							QL			DPY		SEDGR	AIN		IGVVSW
	AGF		TSSPEEASDEM							SVF			F		IIGM	DIAVF		TVPCGTF
	TF		AVR							N			L		AK	TL		PIVY
	ADIN		QTIIR							M			GTL		DVTN	TVGF		VSAY
	H		VAL							L			R		AAL	DL		SDW
	AIR		QQTM							L			K		EITSH	SDK		DTK
	GR		DAL							VF			VTGN		EEK	IN
	Y		IVL							N			GL		PEM	VIGL
	EAVADR		AN							TAIR			L		QEM	PSQDQK
	M		CCSL							N			IN		DDK	PY
	R		ATAIL							SM			SGEVW		ISDEVVTVAVTATETM	AQAATL
	IL		QR							N			QR		AGAL	SGW
	L		GGSL							GL			H		SAL	GSTSN
	QATVVL		SAVPVVL							TY			R		PEW	SM
	PL		QTSL							VIDIIN			K		QVK	L
	VGW		CL							PETETVL			AL		AQQQL	PETSDTL
	L		IVTDQSEK							Y			EPTF		DEVF	H
	SAPL		AAISCGW							SAVH			H		GEGGDF	Y
	M		VEAM							L			Y		PATL	AEVTVIPTVN
	SR		EITVGK							L			TAL		EDIGK	CY
	L		CK							Y			H		TVIDAIVK	AL
	AAGAGGSR		QVF							IL			R		ETL	M
	APR		SSY							R			Y		TVVPF	TDDSTF
	QL									R			L		IIDEDIPL	N
	PVPAW									TEDW			DTF		AGGR	N
	L									SH			N		VAPR	N
	PVDIH									TL			K		GCCVAVASF	N
	ATPTY									STQDSSCF			EVCL		DPDL	ICSGPVTGK
	EL									AGY			L		PEPDK	ISSCVGDIGSPL
	L									M			SER		DPGR	VQY
	Y									VQK			L		PGGSATSR	GN
	AL									GR			AAM		IPF	L
	QAF									N			GGQESDVL		GAGSR	IGVVSW
	GCTAAGAF									TIGDSSSECSIF			PL		VCL	N
	SICVDAF									SDF			M		GSSF	TVPCGTF
	F									PF			CL		ATL	GM
	IR									L			SSL		EM	PIVY
	L									EM			R		VTL	TR
	M									L			ITM		TVVSGSTR	VSAY
	L									PL			CAL		DL	SDW
	L									H			GGM		SITAH	IK
	ISAEIEVL									H			EY		EQSL	EY
	CEN									M			DVVEPDQY			M
	ISAIGVPH									N			QQQQL			DTK
	PAQGSGGCICR									H			ASEF
	CQPN									R			IGF
	AADL									H			L
	ACTCK									F			K
	GCVK									F			VF
	AF									R			QATM
	TSSPEEASDEM									R			F
	Y									K			R
	QL									VVN			PW
	L									F			K
	VK									R			AIN
	AVR									L			SL
	H									QL			M
	H									VL			W
	QTIIR									TR			M
	M									N			SEDGR
	VAL									SSR			K
	L									SVY			L
	QQTM									QCVQN			K
	DAL									GSL			K
	VF									L			IIGM
	IVL									R			AK
	F									CM			DVTN
	AN									M			R
	M									ETL			Y
	AN									CIEI			L
	L												AAL
	CCSL												R
	F												VY
	ATAIL												N
	L												TK
	QR												L
	GGSL												EITSH
	TK												F
	TL												SSL
	K												L
	GL												L
	SAVPVVL												EEK
	Y												PEM
	QTSL												QEM
	Y												DDK
	CL												ISDEVVTVAVTATETM
	F												AGAL
	GH												AY
	IVTDQSEK												AL
	L												SAL
	Y												GL
	N												Y
	AAISCGW												PEW
	VN												QVK
	CDAR												AQQQL
	F												DEVF
	K												GEGGDF
	R												L
	SL												R
	L												PATL
	IF												EDIGK
	M												L
	VEAM												TVIDAIVK
	K												ETL
	PL												R
	EITVGK												L
	F												F
	CK												TVVPF
	L												L
	SR												PR
	QM												IIDEDIPL
	L												AGGR
	L												Y
	QVF												VAPR
	H												GCCVAVASF
	SSY												L
	AL												TH
	M												R
	N												DPDL
	L												Y
	L												PEPDK
	Y												F
	Y												DPGR
	Y												F
	H												L
	Y												PGGSATSR
	N												K
	TE												PF
													SY
													IPF
													GAGSR
													VCL
													GSSF
													ATL
													EM
													K
													VTL
													ATL
													L
													R
													QF
													TVVSGSTR
													K
													DL
													EH
													TL
													F
													SITAH
													PL
													K
													GF
													R
													L
													SF
													R
													AR
													K
													EQSL
